# Supplementary material
Source: Springer Nature journal article supplement (https://www.springermedizin.de/resource/supplementary/12889_2007_1102_MOESM6_ESM.pdf/9502456)

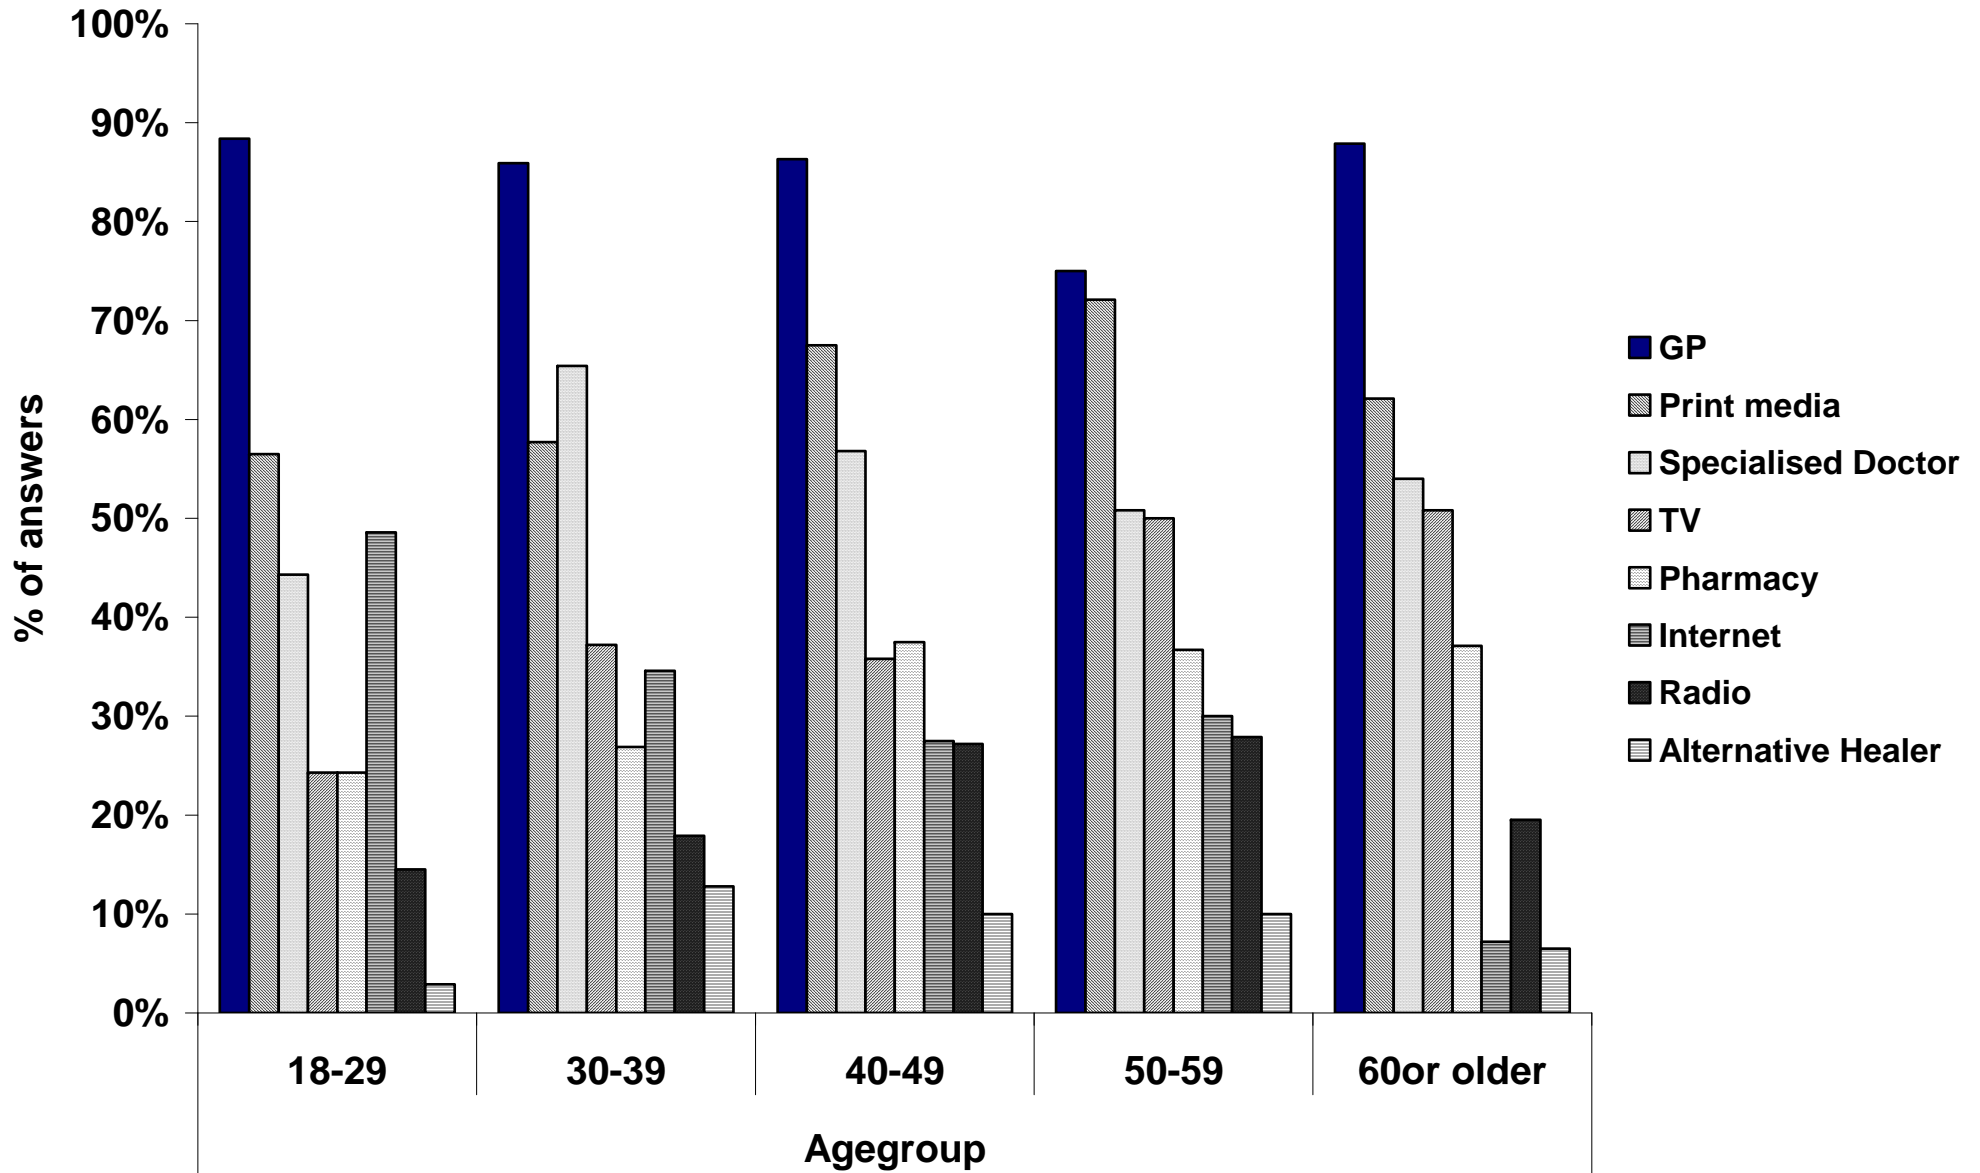

Supplement: MOESM6 [file 9502456]
